# Supplementary material for: Black carbon emissions from Russian diesel sources: case study of Murmansk
Source: Copernicus journal article supplement (doi:10.5194/acp-15-8349-2015), 2015-07-27
Supplement: Supplementary file 1 [file acp-15-8349-2015-supplement.pdf]

Supplement of Atmos. Chem. Phys., 15, 8349–8359, 2015  
<http://www.atmos-chem-phys.net/15/8349/2015/>  
doi:10.5194/acp-15-8349-2015-supplement  
© Author(s) 2015. CC Attribution 3.0 License.

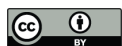

*Supplement of*

## **Black carbon emissions from Russian diesel sources: case study of Murmansk**

**M. Evans et al.**

*Correspondence to:* M. Evans (m.evans@pnnl.gov)

The copyright of individual parts of the supplement might differ from the CC-BY 3.0 licence.

## On-road transport in Murmansk City and Murmansk Region.

Table S1. Bottom-up calculation of fuel consumption by on-road diesel vehicles in Murmansk Region.

|                     | Quantity | Fuel consumption, t |
|---------------------|----------|---------------------|
| Passenger cars      | 14,500   | 19,700              |
| Light duty vehicles | 2,600    | 11,100              |
| Heavy duty trucks   | 3,900    | 31,300              |
| Buses               | 260      | 3,000               |
| Total               | 21,260   | 65,100              |

Based on adjusted data.

Table S2. Number and total length of roads in Murmansk City.

|                        | Number of roads | Total length, km | Share, % |
|------------------------|-----------------|------------------|----------|
| Category I – Arterial  | 22              | 37               | 27%      |
| Category II – Highways | 53              | 58               | 42%      |
| Category III – Local   | 106             | 43               | 31%      |
| Total                  | 181             | 138              | 100%     |

(Murmansk City Administration, 2009)

Table S3. Average annual kilometers traveled per vehicle, different sources.

|        | NIIAT <sup>a</sup> | Avtostat <sup>b</sup> | MSTU inspection station <sup>c</sup> |
|--------|--------------------|-----------------------|--------------------------------------|
| Cars   | 15,000             | 16,700                | 17,000                               |
| LDVs   | 35,000             | NA                    | NA                                   |
| Trucks | 35,000             | NA                    | NA                                   |
| Buses  | 45,000             | NA                    | NA                                   |

<sup>a</sup>NIIAT, 2008;

<sup>b</sup>Avtostat, 2010;

<sup>c</sup>MSTU, 2012.

Table S4. Number of on-road vehicles by category in Murmansk City (based on video surveys).

|        | Cars  | LDVs | Trucks | Buses |
|--------|-------|------|--------|-------|
| Euro 0 | 491   | 74   | 228    | 76    |
| Euro 1 | 0     | 0    | 0      | 2     |
| Euro 2 | 545   | 82   | 90     | 12    |
| Euro 3 | 2,072 | 322  | 133    | 27    |
| Euro 4 | 600   | 112  | 41     | 6     |
| Euro 5 | 1,745 | 339  | 50     | 1     |
| Total  | 5,453 | 929  | 546    | 124   |

Table S5. BC emissions from on-road vehicles in Murmansk City based on COPERT with NIAT emission factors (t per year).

| Vehicle class                    | Number of vehicles, based on video surveys | PM cold start, t/year | PM hot emissions, t/year | Total PM emissions, t/year | BC/PM ratio | BC emissions, t/year |
|----------------------------------|--------------------------------------------|-----------------------|--------------------------|----------------------------|-------------|----------------------|
| <b>Cars</b>                      |                                            |                       |                          |                            |             |                      |
| Euro 0                           | 491                                        | 0.87                  | 1.47                     | 2.34                       | 0.55        | 1.29                 |
| Euro 1                           | 0                                          | 0                     | 0                        | 0                          | 0.70        | 0.00                 |
| Euro 2                           | 545                                        | 0.29                  | 0.49                     | 0.78                       | 0.80        | 0.62                 |
| Euro 3                           | 2,072                                      | 0.73                  | 1.24                     | 1.98                       | 0.85        | 1.68                 |
| Euro 4                           | 600                                        | 0.06                  | 0.11                     | 0.17                       | 0.87        | 0.15                 |
| Euro 5                           | 1,745                                      | 0.05                  | 0.08                     | 0.13                       | 1           | 0.13                 |
| <b>Total cars</b>                | <b>5,452</b>                               | <b>2.00</b>           | <b>3.39</b>              | <b>5.40</b>                |             | <b>3.89</b>          |
| <b>Light duty vehicles</b>       |                                            |                       |                          |                            |             |                      |
| Euro 0                           | 74                                         | 0.35                  | 0.60                     | 0.95                       | 0.55        | 0.52                 |
| Euro 1                           | 0                                          | 0.00                  | 0.00                     | 0.00                       | 0.70        | 0.00                 |
| Euro 2                           | 82                                         | 0.12                  | 0.20                     | 0.32                       | 0.80        | 0.26                 |
| Euro 3                           | 322                                        | 0.33                  | 0.56                     | 0.90                       | 0.85        | 0.76                 |
| Euro 4                           | 112                                        | 0.07                  | 0.12                     | 0.19                       | 0.87        | 0.16                 |
| Euro 5                           | 339                                        | 0.01                  | 0.02                     | 0.04                       | 1           | 0.04                 |
| <b>Total light duty vehicles</b> | <b>929</b>                                 | <b>0.89</b>           | <b>1.50</b>              | <b>2.39</b>                |             | <b>1.74</b>          |
| <b>Trucks</b>                    |                                            |                       |                          |                            |             |                      |
| Euro 0                           | 228                                        | -                     | 5.89                     | 5.89                       | 0.50        | 2.94                 |
| Euro I                           | 0                                          | -                     | 0.07                     | 0.07                       | 0.65        | 0.05                 |
| Euro II                          | 90                                         | -                     | 0.60                     | 0.60                       | 0.65        | 0.39                 |
| Euro III                         | 133                                        | -                     | 0.64                     | 0.64                       | 0.70        | 0.45                 |
| Euro IV                          | 41                                         | -                     | 0.05                     | 0.05                       | 0.75        | 0.04                 |
| Euro V                           | 50                                         | -                     | 0.04                     | 0.04                       | 0.75        | 0.03                 |
| <b>Total trucks</b>              | <b>546</b>                                 | <b>-</b>              | <b>5.89</b>              | <b>5.89</b>                |             | <b>3.90</b>          |
| <b>Buses</b>                     |                                            |                       |                          |                            |             |                      |
| Euro 0                           | 76                                         | -                     | 3.39                     | 3.39                       | 0.50        | 1.69                 |
| Euro I                           | 1                                          | -                     | 0.03                     | 0.03                       | 0.65        | 0.02                 |
| Euro II                          | 12                                         | -                     | 0.46                     | 0.46                       | 0.65        | 0.30                 |
| Euro III                         | 27                                         | -                     | 0.23                     | 0.23                       | 0.70        | 0.16                 |
| Euro IV                          | 7                                          | -                     | 0.01                     | 0.01                       | 0.75        | 0.01                 |
| Euro V                           | 1                                          | -                     | 0.00                     | 0.00                       | 0.75        | 0.00                 |
| <b>Total buses</b>               | <b>124</b>                                 | <b>-</b>              | <b>3.39</b>              | <b>3.39</b>                |             | <b>2.18</b>          |
| <b>Total Murmansk</b>            | <b>7,051</b>                               | <b>2.89</b>           | <b>16.31</b>             | <b>19.20</b>               |             | <b>11.7</b>          |

The starting point in emission calculations is the analysis of the vehicle registry. Traffic police is responsible for registering all on-road vehicles in Russia. However, vehicle registries, particularly in countries where registries are out of date, are inadequate for emission calculations.

As a result, we decided to use a video survey method developed for IVE to study the traffic flows in Murmansk. We compared data from video survey with vehicle registry and found that the differences are very significant. The registry is outdated and shows many vehicles that are not in use anymore, mostly old heavy duty truck and buses. For example, the share of vehicles without emission controls (Euro 0) on the roads is much lower than is shown in the registry. As a result we rely on video survey to estimate the number of vehicles in use in the city.

We adjusted the vehicles registry to correct the information about the vehicle distribution by Euro class. For cars and LDV, we adjusted the information on Euro class distribution based on the parking lot surveys and data from a vehicle inspection station. For trucks and buses, we adjusted the numbers based on data from the largest bus company and other commercial vehicle companies.

We used COPERT model to calculate emissions from on-road transport. COPERT is a free software program developed by Emisia SA. The development of COPERT is coordinated by EEA, in the framework of the activities of the European Topic Centre for Air Pollution and Climate Change Mitigation. COPERT has been developed for official road transport emission inventory preparation in EEA member countries. COPERT can be downloaded for free at <http://emisiasa.com/copert>

NIIAT methodology is designed to calculate emissions from on-road transport in urban conditions. Main provisions are harmonized with the international methodology inventory of emissions EMEP /CORINAIR. NIIAT provided copies of the methodologies. There is no software developed for NIIAT methodology. We developed an Excel spreadsheet for emission calculations.

For emission calculations of vehicular emissions in Murmansk Region, we adjusted vehicle registry in two ways:

- 1) We apply the distribution by Euro class we found in the city to registered vehicles in the region.
- 2) We apply the ratio between registered and observed vehicles to eliminate from the registry vehicles that are not in use.

Table S6. BC emissions from on-road vehicles in Murmansk Region, (based on universal NIIAT methodology) (t per year).

| Vehicle class                | Number of vehicles | PM cold start, t/year | PM hot emissions, t/year | Total PM emissions, t/year | BC/PM ratio | BC emissions, t/year |
|------------------------------|--------------------|-----------------------|--------------------------|----------------------------|-------------|----------------------|
| <b>Cars</b>                  |                    |                       |                          |                            |             |                      |
| Euro 0                       | 1,309              | 0.01                  | 3.93                     | 3.94                       | 0.55        | 2.17                 |
| Euro 1                       | 0                  | 0.00                  | 0.00                     | 0.00                       | 0.70        | 0.00                 |
| Euro 2                       | 1,454              | 0.01                  | 1.31                     | 1.31                       | 0.80        | 1.05                 |
| Euro 3                       | 5,526              | 0.02                  | 3.32                     | 3.33                       | 0.85        | 2.83                 |
| Euro 4                       | 1,600              | 0.00                  | 0.29                     | 0.29                       | 0.87        | 0.25                 |
| Euro 5                       | 4,653              | 0.01                  | 0.21                     | 0.22                       | 1.00        | 0.22                 |
| Total cars                   | <b>14,542</b>      | 0.05                  | 9.05                     | 9.10                       |             | 6.53                 |
| <b>Light duty vehicles</b>   |                    |                       |                          |                            |             |                      |
| Euro 0                       | 238                | 0.02                  | 1.92                     | 1.94                       | 0.55        | 1.07                 |
| Euro 1                       | 0                  | 0.00                  | 0.00                     | 0.00                       | 0.70        | 0.00                 |
| Euro 2                       | 264                | 0.01                  | 0.65                     | 0.65                       | 0.80        | 0.52                 |
| Euro 3                       | 1,005              | 0.02                  | 1.76                     | 1.77                       | 0.85        | 1.51                 |
| Euro 4                       | 291                | 0.00                  | 0.31                     | 0.31                       | 0.87        | 0.27                 |
| Euro 5                       | 846                | 0.01                  | 0.06                     | 0.07                       | 1.00        | 0.07                 |
| Total light duty vehicles    | <b>2,645</b>       | 0.06                  | 4.69                     | 4.75                       |             | 3.44                 |
| <b>Trucks</b>                |                    |                       |                          |                            |             |                      |
| Euro 0                       | 1,628              | 0.68                  | 71.77                    | 72.45                      | 0.50        | 36.22                |
| Euro I                       | 29                 | 0.00                  | 0.20                     | 0.21                       | 0.65        | 0.13                 |
| Euro II                      | 638                | 0.02                  | 1.93                     | 1.95                       | 0.65        | 1.27                 |
| Euro III                     | 961                | 0.05                  | 2.56                     | 2.60                       | 0.70        | 1.82                 |
| Euro IV                      | 395                | 0.02                  | 0.21                     | 0.23                       | 0.75        | 0.17                 |
| Euro V                       | 251                | 0.01                  | 0.12                     | 0.14                       | 0.75        | 0.10                 |
| Total trucks                 | <b>3,902</b>       | 0.78                  | 76.80                    | 77.58                      |             | 39.72                |
| <b>Buses</b>                 |                    |                       |                          |                            |             |                      |
| Euro 0                       | 139                | 0.03                  | 5.90                     | 5.93                       | 0.50        | 2.97                 |
| Euro I                       | 4                  | 0.00                  | 0.02                     | 0.02                       | 0.65        | 0.01                 |
| Euro II                      | 48                 | 0.00                  | 0.71                     | 0.71                       | 0.65        | 0.46                 |
| Euro III                     | 57                 | 0.01                  | 0.78                     | 0.79                       | 0.70        | 0.55                 |
| Euro IV                      | 13                 | 0.00                  | 0.02                     | 0.02                       | 0.75        | 0.01                 |
| Euro V                       | 2                  | 0.00                  | 0.00                     | 0.00                       | 0.75        | 0.00                 |
| Total buses                  | <b>262</b>         | 0.04                  | 7.43                     | 7.47                       |             | 4.01                 |
| <b>Total Murmansk Region</b> | <b>21,351</b>      | <b>0.94</b>           | <b>97.96</b>             | <b>98.90</b>               |             | <b>53.70</b>         |

## Off-road mining vehicles and equipment

Table S7. PM emission standards for off-road diesel vehicles in the U.S. and EU (g/kWh).

| Rated Power<br>(kW) | EPA (U.S.)        |            |            | EEA (Europe) |                             |               |
|---------------------|-------------------|------------|------------|--------------|-----------------------------|---------------|
|                     | EPA(U.S.)<br>Tier | Model Year | PM (g/kWh) | Stage        | Year<br>(transient<br>load) | PM<br>(g/kWh) |
| kW<8                | Tier 1            | 2000       | 1.0        | Pre stage    | -                           | -             |
|                     | Tier 2            | 2005       | 0.80       | Stage 1      | -                           | -             |
| 8<kW<19             | Tier 1            | 2000       | 0.80       | Stage 2      | -                           | -             |
|                     | Tier 2            | 2005       | 0.80       | Stage 1      | -                           | -             |
| 19<kW<37            | Tier 1            | 1999       | 0.80       | Stage 2      | -                           | -             |
|                     | Tier 2            | 2004       | 0.60       | Stage 1      | 2001                        | 0.80          |
|                     | -                 | -          | -          | Stage 2      | 2007                        | 0.60          |
| 37<kW<75            | Tier 1            | 1998       | -          | Stage 1      | 1999                        | 0.85          |
|                     | Tier 2            | 2004       | 0.40       | Stage 2      | 2004                        | 0.40          |
|                     | Tier 3            | 2008       | 0.40       | Stage 3 A    | 2008                        | 0.40          |
| 75<kW<130           | Tier 1            | 1997       | -          | Stage 1      | -                           | -             |
|                     | Tier 2            | 2003       | 0.30       | Stage 2      | 2003                        | 0.30          |
|                     | Tier 3            | 2007       | 0.30       | Stage 3 A    | 2007                        | 0.30          |
| 130<kW<560          | Tier 1            | 1996       | 0.54       | Stage 1      | -                           | -             |
|                     | Tier 2            | 2003       | 0.20       | Stage 2      | 2002                        | 0.20          |
|                     | Tier 3            | 2006       | 0.20       | Stage 3 A    | 2007                        | 0.20          |
| kW>560              | Tier 1            | 2000       | 0.54       | Stage 1      | -                           | -             |
|                     | Tier 2            | 2006       | 0.20       | Stage 2      | -                           | -             |
|                     | Tier 3            | -          | -          | Stage 3 A    | -                           | -             |

Table S8. PM<sub>2.5</sub> emission factors for off-road machinery, g/kg of diesel fuel.

| Sector                                                                                                                                                                 | <1981 | 1981-<br>1990 | 1991-<br>Stage I | Stage<br>I | Stage<br>II |
|------------------------------------------------------------------------------------------------------------------------------------------------------------------------|-------|---------------|------------------|------------|-------------|
| Mobile combustion in manufacturing industries and construction land-based mobile machinery;<br>Commercial and institutional land-based mobile machinery<br>(EEA, 2013) | 6.207 | 4.308         | 3.551            | 0.967      | 1.031       |

Table S9. Diesel fuel consumption by the largest mines in Murmansk Region, tons.

| Company          | 2010   | 2011   | 2012   |
|------------------|--------|--------|--------|
| Apatity          | 65,954 | 67,509 | 64,469 |
| Kovdorskiy GOK   | 35,277 | 42,262 | 47,395 |
| Olenegorskiy GOK | 16,635 | 18,661 | 21,233 |
| Kolskaya GMK     | 5,766  | 9,786  | 5,457  |

Sources: Apatity - <http://www.e-disclosure.ru/portal/company.aspx?id=645>,  
 Kovdorskiy GOK - <http://www.e-disclosure.ru/portal/company.aspx?id=3406>,  
 Olenegorskiy GOK - <http://www.e-disclosure.ru/portal/company.aspx?id=5740>,  
 Kolskaya GMK - <http://www.e-disclosure.ru/portal/company.aspx?id=7833>,

Table S10. Technical characteristics of BELAZ trucks.

| Model | Payload, tons | Engine                          | Rated power capacity, kW |
|-------|---------------|---------------------------------|--------------------------|
| 7547  | 45            | YaMZ-240NM2                     | 368                      |
| 75473 | 45            | Cummins KTA 19-C                | 448                      |
| 7555B | 55            | Cummins KTTA 19-C               | 522                      |
| 7555D | 55            | Cummins KTTA 19-C               | 522                      |
| 7555E | 60            | Cummins QSK 19-C                | 560                      |
| 7555F | 55            | Cummins QSK 19-C                | 522                      |
| 75570 | 90            | Cummins QST 30-C                | 783                      |
| 75571 | 90            | Cummins QST 30-C                | 783                      |
| 75121 | 120           | Pielstick 8PA4-185              | 882                      |
| 7513  | 130-136       | Cummins QSK 45-C                | 1193                     |
| 7513A | 130-136       | MTU DD 12V4000                  | 1194                     |
| 75131 | 130-136       | Cummins KTA 50-C                | 1194                     |
| 75137 | 130-136       | MTU DD 12V4000                  | 1193                     |
| 75135 | 110-130       | Cummins KTA 38-C                | 895                      |
| 75139 | 130-136       | Cummins KTA 50-C                | 1194                     |
| 7514  | 120           | Cummins KTA 38-C                | 895                      |
| 75170 | 154-160       | Cummins QSK 45-C                | 1491                     |
| 75172 | 154-160       | MTU DD 12V4000 (Detroit Diesel) | 1400 (1875)              |
| 75174 | 154-160       | MTU DD 12V4000 (Detroit Diesel) | 1400 (1875)              |

(BELAZ, 2014)

Table S11. Technical characteristics of foreign-made mining trucks.

| Model                               | Payload, tons | Engine                                             | Rated power capacity, kW |
|-------------------------------------|---------------|----------------------------------------------------|--------------------------|
| CAT 777D                            | 90            | Caterpillar 3508B EUI<br>Tier I emissions standard | 746                      |
| CAT 777F                            | 90            | Cat® C32 ACERT™<br>Tier 2                          | 758                      |
| CAT 785C                            | 136           | Caterpillar 3512B-EUI<br>Tier I emissions standard | 1082                     |
| Komatsu HD-1200-1                   | 136           | KTTA 38C-1350<br>Cummins KTA-38-C1200              | 1007/895                 |
| Komatsu HD785                       | 91            | SAA12V140E-3<br>EPA Tier 2                         | 895                      |
| Terex Mining Unit<br>Rig MT 3300 AC | 136           | MTU/DDC 12 V 4000 /<br>Cummins QSK45               | 1286/1193                |
| HD-1200                             | 120           | Cummins KTA-2300C                                  | 895                      |

We assumed that 88% of mining equipment has no emission controls. If we increase the share of equipment which meets Tier 1 standard from 12 to 18%, BC emissions from mining would decrease by 13 tons per year, or more than from all on-road transport in Murmansk City.

## Construction equipment

Table S12. Construction equipment and machinery in Murmansk Region.

|                                      | 2007 | 2008 | 2009 | 2010 | 2011 | 2012 | 2013 |
|--------------------------------------|------|------|------|------|------|------|------|
| Excavators                           | 221  | 206  | 228  | 218  | 192  | 213  | 217  |
| Cranes                               | 39   | 28   | 25   | 19   | 18   | 14   | 21   |
| Graders                              | 65   | 70   | 71   | 82   | 70   | 80   | 74   |
| Bulldozers                           | 195  | 185  | 218  | 216  | 200  | 249  | 244  |
| Special cranes                       | 11   | 15   | 19   | 12   | 13   | 13   | 9    |
| Tower cranes                         | 24   | 14   | 11   | 5    | 5    | 4    | 3    |
| Mobile cranes                        | 128  | 125  | 152  | 131  | 114  | 113  | 138  |
| Lifts                                | 46   | 42   | 52   | 45   | 41   | 47   | 54   |
| Loaders                              | 113  | 173  | 152  | 129  | 142  | 221  | 227  |
| Tractors                             | 97   | 80   | 130  | 122  | 128  | 143  | 126  |
| Drills                               | 4    | 3    | 5    | 2    | 7    | 7    | 9    |
| Rollers                              | 67   | 58   | 56   | 55   | 46   | 43   | 37   |
| Cement mixers                        | 26   | 32   | 18   | 11   | 8    | 10   | 8    |
| Construction and finishing equipment | 160  | 140  | 252  | 263  | 545  | 551  | 376  |
| Hydro hummers                        | 28   | 30   | 32   | 27   | 27   | 43   | 32   |

(MBS, 2012)

There are many uncompleted construction sites that have remained in this state for many years. Only 32,600 square meters of residential buildings and 34,100 square meters of non-residential buildings were built in 2012. Industrial construction is growing, but diesel consumption in this sector appears under industrial consumption, so we did not consider it separately here. There are 16 major building construction companies, and 3.8% of the labor force or 12,000 people work in the construction industry. Currently, construction creates 3.4% of the gross regional product.



## Fishing and marine transport in Murmansk Region

Table S13. Number of fishing vessels registered in Murmansk Region.

|                        | 2000 | 2006 | 2007 | 2008 | 2009 | 2010 | 2011 | 2012 |
|------------------------|------|------|------|------|------|------|------|------|
| Fishing vessels        | 279  | 270  | 270  | 265  | 247  | 225  | 219  | 214  |
| Super trawler          | 20   | 12   | 11   | 11   | 11   | 12   | 12   | 12   |
| Large                  | 37   | 26   | 20   | 17   | 15   | 14   | 14   | 12   |
| Medium                 | 203  | 169  | 164  | 156  | 145  | 133  | 125  | 122  |
| Small                  | 19   | 63   | 75   | 81   | 76   | 66   | 68   | 68   |
| Fish transport vessels | 24   | 25   | 33   | 21   | 18   | 16   | 13   | 12   |
| All                    | 303  | 295  | 303  | 286  | 265  | 241  | 232  | 226  |

(Zabolotsky, 2012)

Table S14. Age structure of the fishing fleet, 2012 (years).

|                        | Up to 20 years |      | 20 years or more |      | Average age, years |
|------------------------|----------------|------|------------------|------|--------------------|
|                        | number         | %    | number           | %    |                    |
| Fishing vessels        | 30             | 14.0 | 184              | 86.0 | 26.2               |
| Extra-large            | 2              | 16.7 | 10               | 83.3 | 23.1               |
| Large                  | 2              | 16.7 | 10               | 83.3 | 25.8               |
| Medium                 | 16             | 13.1 | 106              | 86.3 | 26.8               |
| Small                  | 10             | 14.7 | 58               | 85.3 | 25.9               |
| Fish transport vessels | 1              | 8.3  | 11               | 91.7 | 30.7               |
| All                    | 31             | 13.7 | 195              | 86.3 | 26.5               |

(Committee for the Fishery Complex of Murmansk Region, 2013)

Table S15. Distribution of fishing vessels by engine power (based on the Murmansk Fishing Port calls).

| Engine power, kW | Share of port calls |
|------------------|---------------------|
| < 240            | 34%                 |
| 240-300          | 5%                  |
| 300-400          | 1%                  |
| 400-500          | 4%                  |
| 500-600          | 12%                 |
| 600-700          | 2%                  |
| 700-800          | 2%                  |
| 800-900          | 16%                 |
| 900-1000         | 4%                  |
| 1000-1100        | 11%                 |
| 2000-3000        | 4%                  |
| 3000-4000        | 2%                  |
| 4000-5000        | 2%                  |
| Total            | 100%                |

(Murmansk Port, 2014)

Table S16. Bottom-up calculation of fuel consumption by medium and small fishing vessels (based on the Murmansk Fishing Port calls).

| Engine power, kW | Number of port calls | Engine load % | Time, hours | Fuel efficiency, kg diesel /kWh | Fuel consumption, kg |
|------------------|----------------------|---------------|-------------|---------------------------------|----------------------|
| 220              | 542                  | 0.6           | 7           | 0.203                           | 100,351              |
| 232              | 7                    | 0.6           | 7           | 0.203                           | 1,385                |
| 272              | 73                   | 0.6           | 7           | 0.203                           | 16,929               |
| 294              | 48                   | 0.6           | 7           | 0.203                           | 12,032               |
| 331              | 20                   | 0.6           | 7           | 0.203                           | 5,644                |
| 368              | 36                   | 0.6           | 7           | 0.203                           | 11,295               |
| 241              | 15                   | 0.6           | 7           | 0.203                           | 3,082                |
| 265              | 25                   | 0.6           | 7           | 0.203                           | 5,648                |
| 590              | 143                  | 0.6           | 7           | 0.203                           | 71,934               |
| 596              | 9                    | 0.6           | 7           | 0.203                           | 4,573                |
| 618              | 19                   | 0.6           | 7           | 0.203                           | 10,011               |
| 626              | 7                    | 0.6           | 7           | 0.203                           | 3,736                |
| 736              | 44                   | 0.6           | 7           | 0.203                           | 27,611               |
| 860              | 302                  | 0.6           | 7           | 0.203                           | 221,437              |
| 970              | 74                   | 0.6           | 7           | 0.203                           | 61,200               |
| 1120             | 30                   | 0.6           | 7           | 0.203                           | 28,647               |
| 1325             | 12                   | 0.6           | 7           | 0.203                           | 13,556               |
| 1470             | 9                    | 0.6           | 7           | 0.203                           | 11,280               |
| 1500             | 32                   | 0.6           | 7           | 0.203                           | 40,925               |
| 1620             | 46                   | 0.6           | 7           | 0.203                           | 63,536               |
| 1650             | 22                   | 0.6           | 7           | 0.203                           | 30,949               |
| 1760             | 9                    | 0.6           | 7           | 0.203                           | 13,505               |
| 1800             | 17                   | 0.6           | 7           | 0.203                           | 26,090               |
| 1950             | 24                   | 0.6           | 7           | 0.203                           | 39,902               |
| 2005             | 7                    | 0.6           | 7           | 0.203                           | 11,966               |
| 2040             | 15                   | 0.6           | 7           | 0.203                           | 26,090               |
| 2160             | 21                   | 0.6           | 7           | 0.203                           | 38,674               |
| 2200             | 6                    | 0.6           | 7           | 0.203                           | 11,254               |
| 2800             | 7                    | 0.6           | 7           | 0.203                           | 16,711               |
| 3000             | 10                   | 0.6           | 7           | 0.203                           | 25,578               |
| 3080             | 28                   | 0.6           | 7           | 0.203                           | 73,528               |
| 4350             | 9                    | 0.6           | 7           | 0.203                           | 33,379               |
| 5300             | 39                   | 0.6           | 7           | 0.203                           | 176,232              |
| Total            | 1707                 |               |             |                                 | 1,238,672            |

(Murmansk Port, 2014)

## The distribution of gross tonnage of the ships calling into the Murmansk Port

Table S17. Tankers

| Gross tonnage, t | Number of calls | Share, % |
|------------------|-----------------|----------|
| < 2000           | 27              | 6%       |
| 2000-4000        | 47              | 11%      |
| 4000-10000       | 7               | 2%       |
| 10000-20000      | 37              | 9%       |
| 20000-30000      | 108             | 26%      |
| 30000-40000      | 7               | 2%       |
| 40000-50000      | 171             | 41%      |
| > 50000          | 16              | 4%       |
| Total            | 420             | 100%     |

(Murmansk Port, 2014)

Table S18. Cargo ships

| Gross tonnage, t | Number of calls | Share, % |
|------------------|-----------------|----------|
| < 2000           | 38              | 6.3%     |
| 2 000-4 000      | 128             | 21.2%    |
| 4 000-10 000     | 85              | 14.1%    |
| 10 000-20 000    | 120             | 19.9%    |
| 20 000-30 000    | 26              | 4.3%     |
| 30 000-40 000    | 87              | 14.4%    |
| 40 000-50 000    | 103             | 17.1%    |
| > 50 000         | 17              | 2.8%     |
| Total            | 604             | 100.0%   |

(Murmansk Port, 2014)

Table S19 Passenger ships

| Gross tonnage, t | Number of calls | Share, % |
|------------------|-----------------|----------|
| < 3000           | 7               | 8%       |
| 4000-5000        | 64              | 77%      |
| 5000-10 000      | 3               | 4%       |
| 10 000 -15000    | 3               | 4%       |
| 15 000-20 000    | 2               | 2%       |
| >20 000          | 4               | 5%       |
| Total            | 83              | 100%     |

(Murmansk Port, 2014)

## Diesel generators in Murmansk Region

Table S20. Diesel generators using subsidized fuel in remote areas of Murmansk Region.

| Settlement   | Quantity | Capacity, kW | Fuel consumption, tons per year |
|--------------|----------|--------------|---------------------------------|
| Krasnoschele | 2        | 400          | 341                             |
|              | 1        | 500          |                                 |
| Kanevka      | 2        | 90           | 30                              |
| Sosnovka     | 1        | 90           | 30                              |
| Varzuga      | 1        | 60           |                                 |
| Kashkarantsy | 1        | 30           | 62                              |
| Tetrino      | 1        | 30           | 13                              |
| Pyalitsa     | 1        | 30           | 7                               |
| Chavanga     | 1        | 100          | 117                             |
| Chapoma      | 1        | 100          | 42                              |
| TOTAL        | 12       | 1430         | 642                             |

(Ministry of Energy of Murmansk Region, 2012)

We also obtained a registry of back-up diesel generators from the Murmansk Ministry of Energy. According to the registry, there are 540 diesel generators in the region, which are used as back-up sources of electrical power. We assumed that this is a very small source of emissions because power supply on the Kola Peninsula is very stable, so each back-up generator appears to operate at most a few hours per year. As a result, we did not calculate fuel use or emissions from these generators.

## Uncertainty estimates of BC emissions in Murmansk Region

Uncertainty estimates include uncertainty in activity data - uncertainty in fuel use and existence of emission controls. Activity data uncertainty is based on expert judgments.

We used a summary analysis of BC uncertainty ranges for the BC emission factors from the Bond inventory (Bond et al (2004).

Table S21. Emission factors uncertainty (%)

| Source Category   | Low/Mid, % | High/Mid, % |
|-------------------|------------|-------------|
| Mining            | 50         | 230         |
| On-road transport | 50         | 180         |
| Construction      | 50         | 230         |
| Agriculture       | 50         | 230         |
| Locomotives       | 50         | 230         |
| Diesel generators | 50         | 230         |
| Fishing           | 50         | 230         |

The algorithm for uncertainty calculations was adopted from:

IPCC: IPCC good practice guidance and uncertainty management in national greenhouse gas inventories, Institute for Global Environmental Strategies, Hayama, Japan, 4-88788-000-6, 2000.

Activity data uncertainty (U activity) is a combination of uncertainty on emission controls (U controls) and uncertainty in fuel consumption (U fuel).

$$U \text{ activity} = (U \text{ fuel}^2 + U \text{ controls}^2)^{1/2}$$

The relative uncertainty in the emission for each activity and fuel combination is calculated as the square root of the sum of squares of the relative uncertainties in both activity data and the emission factors. The absolute uncertainty in the emission of each activity and fuel combination is derived by multiplying the relative uncertainty with the emission value.

We built two scenarios which reflect possible minimum and maximum BC emission in the region. Minimal emissions scenario reflects possible decrease in fuel consumption in the sectors and higher use of emission controls. Maximum emissions scenario show possible increase in emissions due to large diesel consumption and lack of controls. Tables S22 and S23 show calculations of low/middle and high/middle relative uncertainty of the inventory.

Table S22. BC emissions uncertainty, low /middle estimate

| Source Category   | BC emissions (t) | Fuel use, % | Assumptions on control, % | Activity data uncertainty (%) | Emission factor uncertainty (%) | Combined relative uncertainty (%) | Absolute uncertainty, (t) |
|-------------------|------------------|-------------|---------------------------|-------------------------------|---------------------------------|-----------------------------------|---------------------------|
| Mining            | 279.3            | 5           | 50                        | 50.2                          | 50                              | 70.9                              | 198.0                     |
| On-road transport | 53.7             | 10          | 10                        | 14.1                          | 50                              | 52.0                              | 27.9                      |
| Construction      | 12.0             | 50          | 30                        | 58.3                          | 50                              | 76.8                              | 9.2                       |
| Agriculture       | 3.9              | 10          | 20                        | 22.4                          | 50                              | 54.8                              | 2.1                       |
| Locomotives       | 22.3             | 10          | 20                        | 22.4                          | 50                              | 54.8                              | 12.2                      |

|                   |       |    |     |       |    |        |        |
|-------------------|-------|----|-----|-------|----|--------|--------|
| Diesel generators | 27.1  | 50 | 100 | 111.8 | 50 | 122.5  | 33.2   |
| Fishing           | 5.3   | 5  | 30  | 30.4  | 50 | 58.5   | 3.0    |
| Total             | 403.7 |    |     |       |    | 195.06 | 203.31 |

Table S23. BC emissions uncertainty, high /middle estimate

| Source Category   | BC Emissions (t) | Fuel use (%) | Assumptions on control (%) | Activity data uncertainty (%) | Emission factor uncertainty (%) | Combined relative uncertainty (%) | Absolute uncertainty, (t) |
|-------------------|------------------|--------------|----------------------------|-------------------------------|---------------------------------|-----------------------------------|---------------------------|
| Mining            | 279.3            | 20           | 5                          | 20.6                          | 230                             | 230.9                             | 645.0                     |
| On-road transport | 53.7             | 200          | 30                         | 202.2                         | 180                             | 270.7                             | 145.4                     |
| Construction      | 12.0             | 30           | 5                          | 30.4                          | 230                             | 232.0                             | 27.8                      |
| Agriculture       | 3.9              | 10           | 0                          | 10.0                          | 230                             | 230.2                             | 8.9                       |
| Locomotives       | 22.3             | 30           | 0                          | 30.0                          | 230                             | 231.9                             | 51.7                      |
| Diesel generators | 27.1             | 20           | 0                          | 20.0                          | 230                             | 230.9                             | 62.6                      |
| Fishing           | 5.1              | 200          | 0                          | 200.0                         | 230                             | 304.8                             | 15.6                      |
| Total             | 403.42           |              |                            |                               |                                 | 658.37                            | 667.00                    |

The relative uncertainty in BC emissions in Murmansk region is from -50% to +165%.

## On-road diesel fleet in Russia

Table S24. Diesel consumption by on-road vehicles in Russia in 2010.

| Fuel consumption | Share, % | Diesel, million tons |
|------------------|----------|----------------------|
| Cars             | 4.4      | 0.550                |
| Trucks           | 81.1     | 10,144               |
| Buses            | 14.5     | 1,814                |

Source: (Donchenko, 2013)

Table S25. Diesel fleet distribution by environmental class in Russia in 2010 (%).

| Ecological class/Vehicle type | Euro 0 | Euro 1 | Euro 2 | Euro 3 and higher |
|-------------------------------|--------|--------|--------|-------------------|
| Cars                          | 44     | 2      | 17     | 37                |
| Trucks                        | 51     | 9      | 20     | 20                |
| Buses                         | 40     | 12     | 25     | 22                |

Source: (Donchenko, 2013)

## References

- Avtostat: Average mileage of cars in Russia is 16,700 kilometers per year (in Russian). Avtostat, Togliatti, Russia, , 2010. Available at <http://www.avtostat.ru/news/view/6069> (accessed 15 January, 2015).
- BELAZ: Mining Dump Trucks, 2014. Available from <http://www.belaz.by/en/catalog/products/dumptrucks/> (Accessed August 11).
- Donchenko, V.: Environmental performances of motor vehicles and fuels in Russian Federation, Scientific Research Institute of Automobiles and Transportation (NIIAT), Moscow, 2013.
- EEA: EMEP/EEA Air Pollutant Emission Inventory Guidebook – 2013, European Environment Agency, Copenhagen, Denmark. Available at <http://www.eea.europa.eu/publications/emep-eea-guidebook-2013>. Accessed July 15, 2014, 2013.
- Murmansk Port: Information System on State Port Control: <http://www.portcall.marinet.ru/table/>, access: July 30, 2014.
- IPCC: IPCC Good Practice Guidance and Uncertainty Management in National Greenhouse Gas Inventories. Institute for Global Environmental Strategies, Hayama, Japan, 2000. Available at <http://www.ipcc-nggip.iges.or.jp/public/gp/english/>. Accessed May 1, 2015.
- MBS: Murmansk Region. Statistical Yearbok-2012 (in Russian), 2012. Available from [http://murmanskstat.gks.ru/wps/wcm/connect/rosstat\\_ts/murmanskstat/resources/7050d7804df676adb1bbfbfd1fd40/03003\\_2012.rar](http://murmanskstat.gks.ru/wps/wcm/connect/rosstat_ts/murmanskstat/resources/7050d7804df676adb1bbfbfd1fd40/03003_2012.rar) (Accessed August 8, 2014).
- Ministry of Energy of Murmansk Region: Fuel consumption by diesel generators in remote settlements (in Russian), Murmansk, Russia, 2012.
- MSTU: The Annual Report of the Vehicle Inspection Station of the Murmansk State Technical University (in Russian). Murmansk State Technical University, 2012.
- Murmansk City Administration: Classification of Streets in Murmansk City, Murmansk, Russia 2009.
- NIIAT: Calculation instruction (methodology) for emission inventory from vehicles on the territory of the largest cities (in Russian), Scientific Research Institute of Automobiles and Transportation, Moscow, Russia, 2008.
- NIIAT: Calculation instruction (methodology) for emission inventory from vehicles into the air (in Russian), Scientific Research Institute of Automobiles and Transportation, Moscow, Russia, 2008.
- Zabolotsky, O.: Fishery - traditional activity of the population in Murmansk Region (in Russian), Fish and Sea Food, 1 (57), 3-13, 2012.
